# Supplementary material
Source: PubMed Central journal article supplement (PMC9550196)
Supplement: NIHMS1838355-supplement-Table_S1.pdf [file NIHMS1838355-supplement-Table_S1.pdf]

|                             | Endothelial cells     |                       |                       | Mural cells                      |
|-----------------------------|-----------------------|-----------------------|-----------------------|----------------------------------|
|                             | light                 | intermediate          | dark                  |                                  |
| Free ribosomes              | +                     | ++                    | +++                   | +++                              |
| Polyribosomes               | +                     | ++                    | ++                    | +++                              |
| Rough endoplasmic reticulum | +                     | +                     | +                     | +++, dilated cisternae           |
| Golgi                       | +                     | +                     | +                     | +                                |
| Mitochondria                | +                     | +                     | ++                    | +++                              |
| Filaments                   | +                     | +                     | +++                   | +                                |
| caveolae                    | yes, luminal membrane | yes, luminal membrane | yes, luminal membrane | no                               |
| Clathrin coated vesicles    | yes, luminal membrane | yes, luminal membrane | yes, luminal membrane | no                               |
| Weibel-Palade bodies        | yes                   | yes                   | yes                   | no                               |
| Microvillae                 | yes, luminal membrane | ?                     | yes, luminal membrane | sometimes, parenchyma            |
| Nucleus                     | elongated             | elongated             | elongated             | irregular                        |
| Heterochromatin clumps      | few                   | few                   | few                   | associated Nuclear envelope      |
| Tight junctions             | yes                   | yes                   | yes                   | no                               |
| Adherent junctions          | yes                   | yes                   | yes                   | sometimes with endothelial cells |
| Contact basal lamina        |                       |                       |                       | yes                              |

**Table S1** Ultrastructural features of second trimester human brain endothelial and mural cells, related to Figures 2 and S2.
